# Supplementary material
Source: PubMed Central journal article supplement (PMC3411254)
Supplement: 10.3163.1536-5050.100.3.010.sg002.pdf [file 10.3163.1536-5050.100.3.010.sg002.pdf]

**The Internet and health information: differences in pet owners based on age, gender, and education**

**Lori R. Kogan, PhD; Regina Schoenfeld-Tacher, PhD; Ann R. Viera, MSLIS**

**APPENDIX B**

**Pet owner survey B**

1. How often do you use the web or Internet either at home or at work:  
 Many times per day     Daily     Not daily, but at least once a week  
 Not weekly, but at least once a month     Less than once a month     Not at all
2. How often do you use the Internet to look for pet health information?  
 Many times per day     Daily     Not daily, but at least once a week  
 Not weekly, but at least once a month     Less than once a month     Not at all

If you *do* use the Internet for pet health information, please continue to question 3.  
 If you *do not* use the Internet for pet health information, please skip to question 12.

3. Searching for pet health information on the Internet has:

|                                                                                     | Strongly<br>agree | Agree | Neutral | Disagree | Strongly<br>disagree |
|-------------------------------------------------------------------------------------|-------------------|-------|---------|----------|----------------------|
| Affected my decision(s) about how to treat my pet's illness or condition            |                   |       |         |          |                      |
| Changed my overall approach to maintaining my pet's health                          |                   |       |         |          |                      |
| Changed the way I cope(d) with my pet's chronic condition or manage(d) his/her pain |                   |       |         |          |                      |
| Affected my decision about whether to take my pet to the veterinarian               |                   |       |         |          |                      |
| Led me to ask my veterinarian new questions                                         |                   |       |         |          |                      |
| Led me to get a second opinion from another veterinarian                            |                   |       |         |          |                      |
| Helped me better understand my pet's health issues                                  |                   |       |         |          |                      |
| Made me better able to communicate with my veterinarian about my pet's health       |                   |       |         |          |                      |
| Helped me make better choices about my pet's health                                 |                   |       |         |          |                      |



8. In general, please rate how trustworthy you find the following sources of pet health information:

|                                        | Very trustworthy | Trustworthy | Neutral | Untrustworthy | Very untrustworthy |
|----------------------------------------|------------------|-------------|---------|---------------|--------------------|
| Veterinarian                           |                  |             |         |               |                    |
| Internet websites                      |                  |             |         |               |                    |
| Blogs or discussion groups             |                  |             |         |               |                    |
| Television                             |                  |             |         |               |                    |
| Family or friends                      |                  |             |         |               |                    |
| Magazines                              |                  |             |         |               |                    |
| Newspapers                             |                  |             |         |               |                    |
| Pamphlets or flyers                    |                  |             |         |               |                    |
| Radio                                  |                  |             |         |               |                    |
| Other pet owners with similar problems |                  |             |         |               |                    |

9. When reading information on pet health websites, how often do you check the accuracy of the information?

- Almost always     Most of the time     Only sometimes  
 Hardly ever     Never     Don't know

10. How do you check the accuracy of pet health information you find on the Internet (select all that apply)?

- Discuss with your veterinarian  
 Compare information from other/additional websites  
 Compare with non-Internet sources (print sources, TV, etc.)  
 Discuss with family or friends  
 Do not check accuracy

11. How important are the following in influencing your perception of a website's accuracy:

|                                                                 | Very important | Important | Neutral | Unimportant | Very unimportant |
|-----------------------------------------------------------------|----------------|-----------|---------|-------------|------------------|
| Endorsement by a government agency or professional organization |                |           |         |             |                  |
| Reliable source or author and his/her credentials               |                |           |         |             |                  |
| Understandability of information                                |                |           |         |             |                  |
| Site is updated frequently                                      |                |           |         |             |                  |
| Layout and appearance of site                                   |                |           |         |             |                  |

Sponsored by a  
reputable drug  
company  
Medical advertising is  
on the site

12. If you do not use the Internet for pet health information, please indicate the reason why  
(select as many as apply):

- I do use the Internet for pet health information
- No access to Internet
- Unfamiliar with Internet
- No interest in information about pet health
- No interest in searching on the Internet
- No confidence in the Internet as source of health care information
- Would rather talk to my vet
- Other...

Please answer the following questions about yourself:

Your age:  20-30  31-40  41-50  51-60  over 60

Your gender:  Male  Female

Your home zip code: \_\_\_\_\_

Your education: please circle the highest level of education you have completed:

Some high school  HS/GED  Some college  2-year degree  
 4-year degree  Graduate degree

Additional comments:

---

Thank you for your time!
